# Supplementary material
Source: PubMed Central journal article supplement (PMC1142606)
Supplement: 7600672s2.pdf [file 7600672s2.pdf]

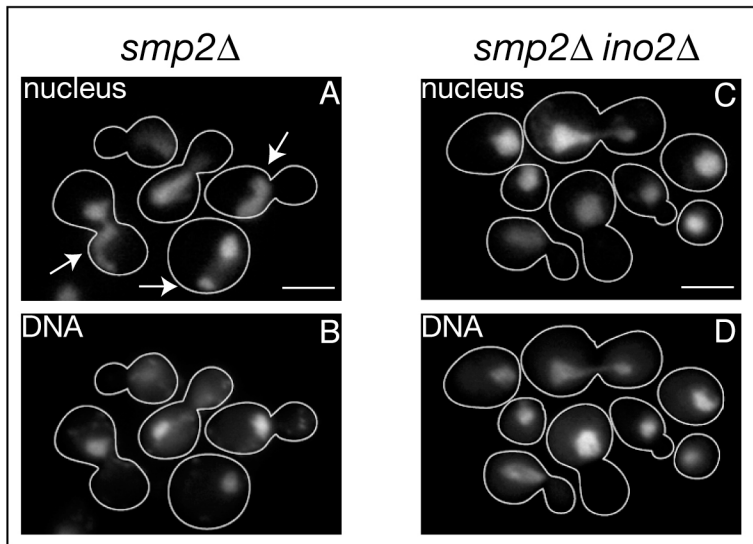

Supplementary Figure 1

## Supplementary Figure 1

Deletion of *INO2* restores normal nuclear structure in *smp2Δ* cells. *smp2Δ* (panels A and B) or *smp2Δ ino2Δ* (panels C and D) cells expressing the intranuclear reporter GFP-Pus1 were grown to early logarithmic phase, fixed for 30 min, stained with DAPI and visualized with a Zeiss Axiovert 200M microscope. Nuclear morphology, depicted by GFP-Pus1, is shown in panels A and C and DNA staining in panels B and D. Arrows in panel A point to enlarged and irregular nuclei present in the *smp2Δ* cells. Bars, 5 μm.
